# Supplementary material for: A unified classification approach rating clinical utility of protein biomarkers across neurologic diseases
Source: PubMed Central journal article supplement (PMC9931915; doi:10.1016/j.ebiom.2023.104456), 2023-02-04
Supplement: mmc2.pdf [file mmc2.pdf]

| Treatment approach |               |                                                                                                                                             |                                                                                                                                                                                                                                                                       |                                                                                                                                                                                                                           |                                                                                                                                                                                       |                                                                                                                                                              |
|--------------------|---------------|---------------------------------------------------------------------------------------------------------------------------------------------|-----------------------------------------------------------------------------------------------------------------------------------------------------------------------------------------------------------------------------------------------------------------------|---------------------------------------------------------------------------------------------------------------------------------------------------------------------------------------------------------------------------|---------------------------------------------------------------------------------------------------------------------------------------------------------------------------------------|--------------------------------------------------------------------------------------------------------------------------------------------------------------|
| „Conservative“     | „Progressive“ | CIViC                                                                                                                                       | ESMO                                                                                                                                                                                                                                                                  | NCT                                                                                                                                                                                                                       | JCR                                                                                                                                                                                   | EDRN                                                                                                                                                         |
|                    |               | <b>A:</b> Proven/consensus association in human medicine<br><br><b>B:</b> Clinical trial or other primary patient data supports association | <b>I A:</b> Prospective randomized trial<br><b>I B:</b> Prospective non-randomized trial<br><b>I C:</b> Basket trials and trials across disease types<br><br><b>II A:</b> Retrospective studies<br><b>II B:</b> Prospective trials; endpoints not currently available | <b>m1 A:</b> Same entity: Prospective study<br><br><br><b>m1 B:</b> Same entity: Retrospective study<br><br><b>m1 C:</b> Same entity: Case reports<br><br><b>m2 A:</b> Different entity: Prospective study                | <b>Tier 1 A:</b> FDA approved therapy/ professional guidelines<br><br><b>Tier 1 B:</b> Well-powered studies with expert consensus                                                     | <b>Phase 5:</b> Disease burden reduction studies<br><br><b>Phase 4:</b> Prospective diagnostic accuracy studies<br><br><b>Phase 3:</b> Retrospective studies |
|                    |               | <b>D:</b> In vivo or in vitro models support association<br><br><b>E:</b> Indirect evidence                                                 | <b>III B:</b> Alteration with predicted impact in same pathway as I<br><b>IV A:</b> in vivo or in vitro evidence<br><b>IV B:</b> in silico evidence<br><b>V:</b> Objective response but not improved outcome                                                          | <b>m2 B:</b> Different entity: Retrospective study<br><b>m2 C:</b> Different entity: Case reports<br><br><b>m3:</b> in vitro / in vivo results<br><b>m4:</b> Biological rationale: no clinical/preclinical data available | <b>Tier 2 C:</b> FDA approval in different entity/ inclusion in clinical trial / multiple small studies with some consensus<br><br><b>Tier 2 D:</b> Preclinical trials / case reports | <b>Phase 2:</b> Clinical assay development<br><br><b>Phase 1:</b> preclinical exploratory studies                                                            |
|                    |               |                                                                                                                                             | <b>X:</b> Benign variants                                                                                                                                                                                                                                             |                                                                                                                                                                                                                           | <b>Tier 3:</b> No convincing evidence of cancer association<br><br><b>Tier 4:</b> No existing evidence of cancer association                                                          |                                                                                                                                                              |
